# Supplementary material for: Maternal Magnolol Supplementation during Pregnancy and Lactation Promotes Antioxidant Capacity, Improves Gut Health, and Alters Gut Microbiota and Metabolites of Weanling Piglets
Source: MDPI journal article supplement (doi:10.3390/metabo13070797), 2023-06-27
Supplement: s1 [file s1]

**Table S1.** Nutrients content of the control diet and pre-starter (%).

| <b>Nutrient Levels</b> | <b>Content</b>   |                  |                    |
|------------------------|------------------|------------------|--------------------|
|                        | <b>Pregnancy</b> | <b>Lactation</b> | <b>Pre-starter</b> |
| Dry matter             | 88.00            | 88.00            | 92.00              |
| Crude protein          | 14.00            | 16.00            | 23.00              |
| Crude fiber            | 8.00             | 6.00             | 6.00               |
| Crude Ash              | 10.00            | 9.00             | 6.50               |
| Total phosphorus       | 0.43             | 0.43             | 0.73               |
| Calcium                | 0.95             | 0.95             | 0.78               |
| NaCl                   | 0.55             | 0.55             | 0.43               |
| Lysine                 | 0.55             | 0.85             | 1.70               |
